# Supplementary material for: Synthesis and characterization of novel titanium complexes bearing [ONX]-type β-enaminoketonato ligands and their application to ethylene (co)polymerization
Source: Royal Society of Chemistry journal article supplement (doi:10.1039/c2dt30326d), 2012-01-01

**Supporting Information**  
to the paper

**Synthesis and characterization of novel titanium complexes bearing  
[ONX]-type  $\beta$ -enaminoketonato ligands and their application to  
ethylene (co)polymerization**

Ping Tao, Xiao-Yan Tang, Bai-Xiang Li, Jing-Yu Liu, Yue-Sheng Li

State Key Laboratory of Polymer Physics and Chemistry, Changchun Institute of Applied Chemistry,  
Chinese Academy of Sciences, Changchun 130022, China

Correspondence e-mail: [l jy@ciac.jl.cn](mailto:l jy@ciac.jl.cn)

### Additional experimental details

**Synthesis of titanium complex 3a [(2-OMeC<sub>6</sub>H<sub>4</sub>)NC(CF<sub>3</sub>)C(H)C(Ph)O]TiCl<sub>2</sub>(thf):** To a stirred solution of ligand **1a** (0.65 g, 2.0 mmol) in dried THF (20.0 mL) at -78 °C was added a 2.20 M *n*-butyllithium hexane solution (0.90 mL, 2.0 mmol) dropwise over a 5 min period. The mixture was allowed to warm to room temperature and stirred for 2.5 h. The resulting mixture was added dropwise to TiCl<sub>4</sub> (2.0 mL, 2.0 mmol) in THF (20.0 mL) at -78 °C with stirring over 30 min. The mixture was allowed to warm to room temperature and stirred for 16 h. The evaporation of the solvent in a vacuum yielded a crude product. To the crude product was added dried CH<sub>2</sub>Cl<sub>2</sub> (20.0 mL), and the mixture was stirred for 10 min and then filtered. The filtrate was concentrated and recrystallized in CH<sub>2</sub>Cl<sub>2</sub>/*n*-hexane at room temperature and yielded the pure complex **3a** as an yellow solid (35%). <sup>1</sup>H NMR (300 MHz, CDCl<sub>3</sub>): δ 7.66-7.57 (m, 2H, Ph-H), 7.50 (m, 2H, Ph-H), 7.34 (dd, 1H, Ph-H), 7.00 (m, 2H, Ph-H), 6.79 (s, 1H, N=CH), 6.53(d, 1H, Ph-H) 4.60 (s, 4H, OCH<sub>2</sub>), 3.68 (s, 3H, OCH<sub>3</sub>), 2.03 (s, 4H, OCH<sub>2</sub>CH<sub>2</sub>). And then, cooling the filtrate in the freezer (-20 °C) gave complex **4a** as a black solid.

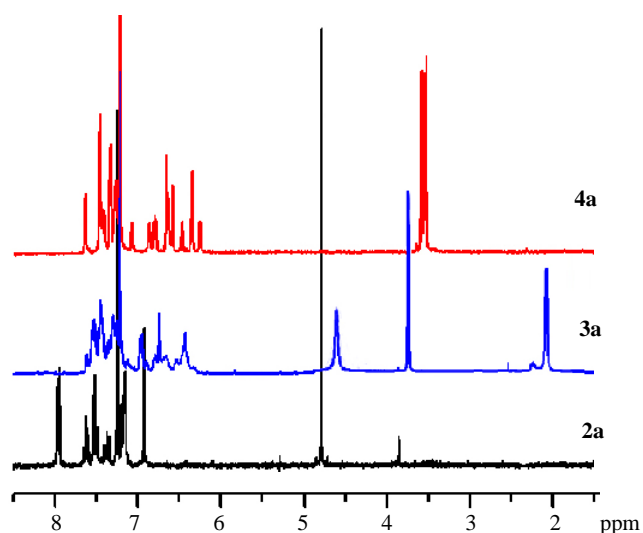

Supplement: c2dt30326d.pdf [file c2dt30326d.pdf]
